# Supplementary material for: Registration and publication of emergency and elective randomised controlled trials in surgery: a cohort study from trial registries
Source: PubMed Central journal article supplement (PMC6042627; doi:10.1136/bmjopen-2018-021700), 2018-07-07
Supplement: bmjopen-2018-021700supp001.pdf [file bmjopen-2018-021700supp001.pdf]

| <b>Sponsorship</b>        | <b>Emergency surgery;<br/>Number (% of total)</b> | <b>Elective surgery;<br/>Number (% of total)</b> | <b>All<br/>Number (% of total)</b> |
|---------------------------|---------------------------------------------------|--------------------------------------------------|------------------------------------|
| <b>Industry</b>           | 5 (12.8)                                          | 112 (29.9)                                       | 117 (28.6)                         |
| <b>Hospital</b>           | 18 (46.2)                                         | 120 (32)                                         | 138 (33.3)                         |
| <b>University</b>         | 10 (25.6)                                         | 92(24.5)                                         | 102 (24.6)                         |
| <b>Government</b>         | 5 (12.8)                                          | 21 (5.6)                                         | 26 (6.3)                           |
| <b>Research institute</b> | 1 (2.6)                                           | 30 (8.0)                                         | 31 (7.5)                           |
| <b>TOTAL</b>              | 39 (100)                                          | 375 (100)                                        | 414 (100)                          |

*Supplementary Table 1 Comparison of the origin of sponsorship between emergency and elective surgical trials. Decimals do not add up exactly to total due to rounding.*
